# Supplementary material for: Microstructural Gradational Properties of Sn-Doped Gallium Oxide Heteroepitaxial Layers Grown Using Mist Chemical Vapor Deposition
Source: MDPI journal article supplement (doi:10.3390/ma15031050), 2022-01-29
Supplement: s1 [file s1]

# Microstructural Gradational Properties of Sn-Doped Gallium Oxide Heteroepitaxial Layers Grown Using Mist Chemical Vapor Deposition

Kyoung-Ho Kim <sup>1,2</sup>, Minh-Tan Ha <sup>3</sup>, Heesoo Lee <sup>2</sup>, Minho Kim <sup>4</sup>, Okhyun Nam <sup>4</sup>, Yun-Ji Shin <sup>1</sup>, Seong-Min Jeong <sup>1</sup> and Si-Young Bae <sup>1,\*</sup>

<sup>1</sup> Semiconductor Materials Center, Korea Institute of Ceramic Engineering and Technology, Jinju 52851, Korea; energykhh@gmail.com (K.-H.K.); shinyj@kicet.re.kr (Y.-J.S.); smjeong@kicet.re.kr (S.-M.J.)

<sup>2</sup> School of Materials Science and Engineering, Pusan National University, Busan 46241, Korea; heesoo@pusan.ac.kr

<sup>3</sup> School of Materials Science and Engineering, Changwon National University, Changwon 51140, Korea; haminhtan.mse@gmail.com

<sup>4</sup> Convergence Center for Advanced Nano Semiconductor (CANS), Department of Nano & Semiconductor Engineering, Korea Polytechnic University, Siheung-si, Gyeonggi-do 15073, Korea; First\_kim88@naver.com (M.K.); ohnam@kpu.ac.kr (O.N.)

\* Correspondence: sybae@kicet.re.kr

**Citation:** Kim, K.-H.; Ha, M.-T.; Lee, H.; Kim, M.; Nam, O.; Shin, Y.-J.; Jeong, S.-M.; Bae, S.-Y.

Microstructural Gradational Properties of Sn-Doped Gallium Oxide Heteroepitaxial Layers Grown Using Mist Chemical Vapor Deposition. *Materials* **2022**, *15*, 1050. <https://doi.org/10.3390/ma15031050>

Academic Editor: Lei Zhang

Received: 24 December 2021

Accepted: 26 January 2022

Published: 29 January 2022

**Publisher's Note:** MDPI stays neutral with regard to jurisdictional claims in published maps and institutional affiliations.

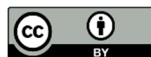

**Copyright:** © 2022 by the authors. Submitted for possible open access publication under the terms and conditions of the Creative Commons Attribution (CC BY) license (<https://creativecommons.org/licenses/by/4.0/>).

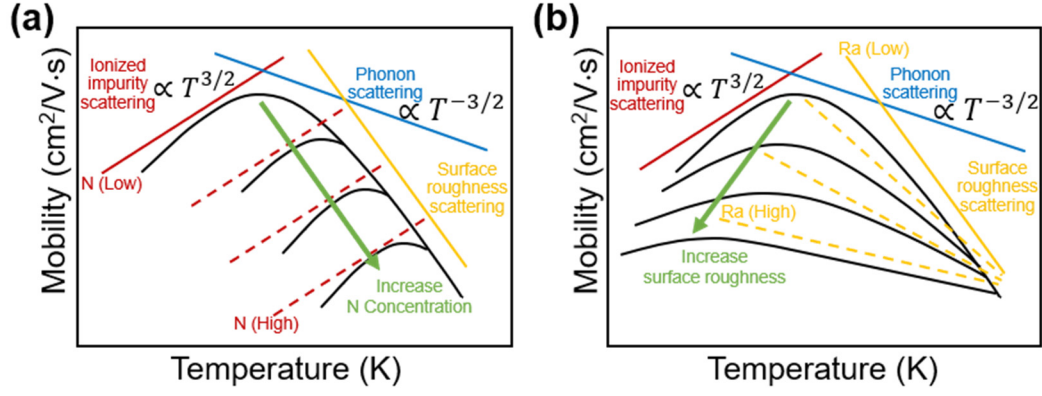

**Figure S1.** Schematic description of the temperature-dependent carrier mobility of the grown layers under effects of various scattering mechanisms: (a) variation in impurity concentration and (b) variation in surface roughness. Note that the peak shifts to high temperature and peak shifts to low temperature with increasing N concentration and surface roughness, respectively [1,2].

### (a) Single layer

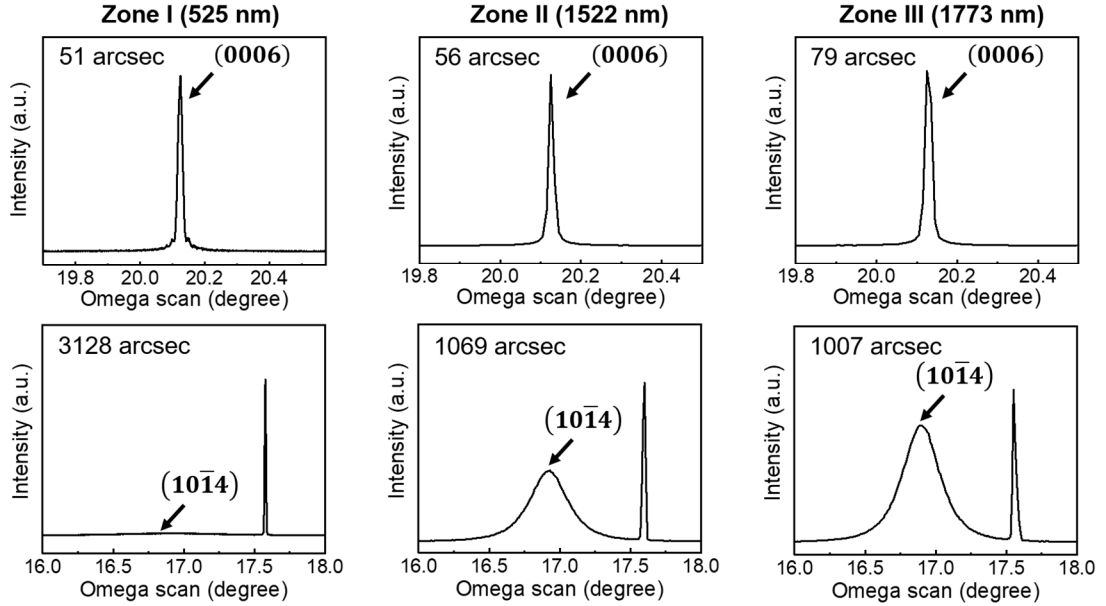

## (b) Double layers

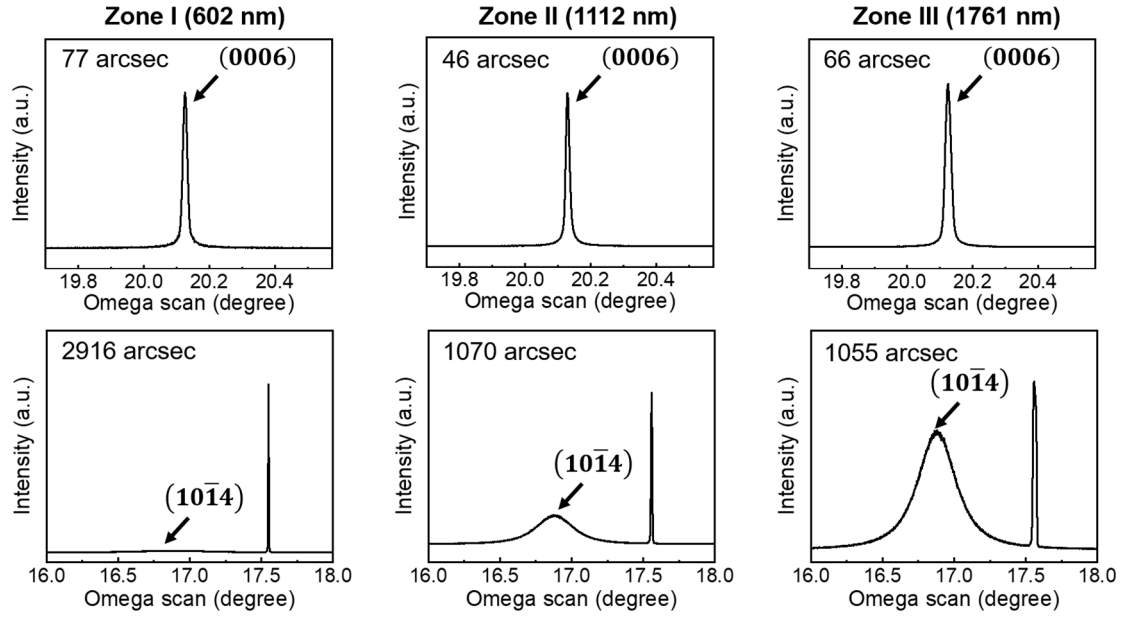

**Figure S2.** (0006) and (10 $\bar{1}4$ ) plane omega-scan XRD patterns and FWHM for (a) single Ga<sub>2</sub>O<sub>3</sub> layer and (b) double Ga<sub>2</sub>O<sub>3</sub> layers with various thicknesses.

**Table S1.** Hall measurement data of the temperature-dependent carrier mobility and carrier concentration for (a) single Ga<sub>2</sub>O<sub>3</sub> layer and (b) double Ga<sub>2</sub>O<sub>3</sub> layers.

| Single layer |                                 |     |     |                                                             |     |      |
|--------------|---------------------------------|-----|-----|-------------------------------------------------------------|-----|------|
| Temp. (K)    | mobility (cm <sup>2</sup> /V·s) |     |     | carrier concentration ( $\times 10^{18}$ cm <sup>-3</sup> ) |     |      |
|              | A                               | B   | C   | A                                                           | B   | C    |
| 80           | 4.0                             | 2.4 | 3.3 | 1.3                                                         | 1.8 | 9.4  |
| 90           | 4.4                             | 2.8 | 3.6 | 1.3                                                         | 1.8 | 9.2  |
| 100          | 4.4                             | 3.0 | 3.7 | 1.3                                                         | 1.8 | 12.0 |
| 110          | 4.4                             | 3.1 | 3.8 | 1.3                                                         | 1.7 | 10.3 |
| 120          | 4.4                             | 3.2 | 3.9 | 1.3                                                         | 1.7 | 9.6  |
| 130          | 4.3                             | 3.3 | 4.0 | 1.3                                                         | 1.7 | 9.0  |
| 140          | 4.4                             | 3.5 | 4.2 | 1.4                                                         | 1.6 | 8.8  |
| 150          | 4.5                             | 3.6 | 4.4 | 1.3                                                         | 1.6 | 8.9  |
| 160          | 4.6                             | 3.7 | 4.4 | 1.4                                                         | 1.6 | 8.8  |
| 170          | 4.6                             | 3.8 | 4.6 | 1.4                                                         | 1.6 | 8.3  |
| 180          | 4.6                             | 3.9 | 4.9 | 1.4                                                         | 1.6 | 8.1  |
| 190          | 4.8                             | 4.0 | 5.1 | 1.4                                                         | 1.7 | 8.3  |
| 200          | 5.0                             | 4.1 | 5.2 | 1.4                                                         | 1.7 | 8.7  |
| 210          | 4.9                             | 4.1 | 5.5 | 1.5                                                         | 1.7 | 9.2  |
| 220          | 4.6                             | 4.2 | 5.4 | 1.5                                                         | 1.7 | 8.6  |
| 230          | 4.6                             | 4.3 | 5.5 | 1.5                                                         | 1.7 | 8.6  |
| 240          | 4.7                             | 4.3 | 5.7 | 1.6                                                         | 1.8 | 9.5  |
| 250          | 4.6                             | 4.3 | 5.8 | 1.6                                                         | 1.8 | 9.0  |
| 260          | 4.3                             | 4.2 | 5.8 | 1.6                                                         | 1.9 | 8.6  |
| 270          | 4.1                             | 4.1 | 6.2 | 1.6                                                         | 2.0 | 8.5  |
| 280          | 4.4                             | 4.1 | 5.9 | 1.6                                                         | 2.0 | 8.3  |
| 290          | 4.3                             | 4.0 | 6.3 | 1.6                                                         | 2.2 | 8.4  |
| 300.         | 4.2                             | 3.9 | 6.3 | 1.5                                                         | 2.5 | 9.6  |

(b)

| Temp. (K) | Double layers                   |     |     |                                                             |     |     |
|-----------|---------------------------------|-----|-----|-------------------------------------------------------------|-----|-----|
|           | mobility (cm <sup>2</sup> /V·s) |     |     | carrier concentration (×10 <sup>18</sup> cm <sup>-3</sup> ) |     |     |
|           | A                               | B   | C   | A                                                           | B   | C   |
| 80        | 2.4                             | 2.1 | 2.2 | 5.4                                                         | 1.8 | 1.2 |
| 90        | 2.4                             | 2.1 | 2.3 | 5.1                                                         | 1.8 | 1.3 |
| 100       | 2.4                             | 2.1 | 2.5 | 5.5                                                         | 1.9 | 1.4 |
| 110       | 2.9                             | 2.3 | 2.5 | 5.0                                                         | 1.7 | 1.3 |
| 120       | 2.9                             | 2.3 | 2.6 | 5.1                                                         | 1.7 | 1.3 |
| 130       | 2.9                             | 2.2 | 2.8 | 5.0                                                         | 1.8 | 1.3 |
| 140       | 3.0                             | 2.4 | 2.8 | 5.1                                                         | 1.6 | 1.3 |
| 150       | 2.9                             | 2.3 | 2.9 | 5.0                                                         | 1.7 | 1.4 |
| 160       | 3.0                             | 2.5 | 2.7 | 4.8                                                         | 1.7 | 1.4 |
| 170       | 3.1                             | 2.6 | 2.8 | 4.7                                                         | 1.6 | 1.4 |
| 180       | 3.1                             | 2.7 | 2.8 | 4.8                                                         | 1.6 | 1.3 |
| 190       | 3.0                             | 2.7 | 2.7 | 5.1                                                         | 1.6 | 1.4 |
| 200       | 3.2                             | 2.8 | 2.8 | 4.8                                                         | 1.6 | 1.3 |
| 210       | 3.3                             | 3.0 | 2.8 | 4.7                                                         | 1.5 | 1.3 |
| 220       | 3.2                             | 3.0 | 2.9 | 4.6                                                         | 1.5 | 1.3 |
| 230       | 3.2                             | 3.1 | 2.9 | 5.0                                                         | 1.5 | 1.2 |
| 240       | 3.2                             | 3.0 | 3.0 | 4.6                                                         | 1.6 | 1.2 |
| 250       | 3.3                             | 3.1 | 3.1 | 4.6                                                         | 1.5 | 1.2 |
| 260       | 3.2                             | 3.0 | 3.2 | 4.6                                                         | 1.6 | 1.3 |
| 270       | 3.2                             | 3.0 | 3.2 | 4.4                                                         | 1.6 | 1.3 |
| 280       | 3.0                             | 3.1 | 3.1 | 5.1                                                         | 1.5 | 1.3 |
| 290       | 3.2                             | 3.1 | 3.2 | 5.1                                                         | 1.6 | 1.3 |
| 300       | 3.1                             | 3.3 | 3.2 | 5.0                                                         | 1.5 | 1.4 |

## References

1. Shin, H.; Lim, K.; Hwang, S.; Han, I.-K.; Jang, M. The Evaluation of Hole Mobility Characteristics with Surface Roughness. *Journal of Nanoscience and Nanotechnology* **2017**, *17*, 7766–7770, doi:10.1166/jnn.2017.14840.
2. Noguchi, M.; Iwamatsu, T.; Amishiro, H.; Watanabe, H.; Kita, K.; Yamakawa, S. Determination of Intrinsic Phonon-Limited Mobility and Carrier Transport Property Extraction of 4H-SiC MOSFETs. In Proceedings of the 2017 IEEE International Electron Devices Meeting (IEDM); IEEE: San Francisco, CA, USA, December **2017**; p. 9.3.1-9.3.4.
